# Supplementary material
Source: PubMed Central journal article supplement (PMC5810584)
Supplement: NIHMS935686-supplement-2.pdf [file NIHMS935686-supplement-2.pdf]

**Table S1. Proteins Associated with GABA<sub>A</sub>R $\gamma$ 2, Related to Figure 2**

Proteins associated with HFY-GABA<sub>A</sub>R $\gamma$ 2 were purified using His and YFP tags from four independent experiments. Age- and sex-matched *Thy1-HFY-GABA<sub>A</sub>R $\gamma$ 2* (TG) and wildtype (WT) mice were used for comparison to remove potential false positives. Proteins listed in this table have passed the following criteria: detected in at least two of four experiments for a protein exclusively found in TG sample; peptide spectrum match (PSM) ratio  $\geq$  6:1 for a protein detected in both TG and WT samples. PSM listed here are cumulative total PSM from four experiments. Protein categories were defined by manual curation from PubMed and GeneCard.

| Accession                              | Gene symbol | Protein name                                                    | WT total PSM | TG total PSM |
|----------------------------------------|-------------|-----------------------------------------------------------------|--------------|--------------|
| CON_GFP                                | GFP         | Green fluorescent protein                                       | 0            | 70           |
| <b>Known associated proteins</b>       |             |                                                                 |              |              |
| IPI00113772.1                          | Gabra1      | Gamma-aminobutyric acid receptor subunit alpha-1                | 0            | 42           |
| IPI00110598.1                          | Gabra2      | Gamma-aminobutyric acid receptor subunit alpha-2                | 0            | 15           |
| IPI00110601.3                          | Gabra3      | Gamma-aminobutyric acid receptor subunit alpha-3                | 0            | 24           |
| IPI00221880.1                          | Gabra5      | Gamma-aminobutyric acid receptor subunit alpha-5                | 0            | 9            |
| IPI00119283.1                          | Gabrb1      | Gamma-aminobutyric acid receptor subunit beta-1                 | 0            | 36           |
| IPI00323554.3                          | Gabrb2      | Gamma-aminobutyric acid receptor subunit beta-2                 | 0            | 68           |
| IPI00130546.1                          | Gabrb3      | Gamma-aminobutyric acid receptor subunit beta-3                 | 0            | 45           |
| IPI00131369.1                          | Gabrg2      | Isoform 2L of Gamma-aminobutyric acid receptor subunit gamma-2  | 0            | 60           |
| IPI00223325.5                          | Gabbr1      | Isoform 1A of Gamma-aminobutyric acid type B receptor subunit 1 | 0            | 4            |
| IPI00816946.1                          | Gphn        | Gephyrin isoform 1                                              | 1            | 8            |
| IPI00468605.4                          | Nlgn2       | Neurologin-2                                                    | 1            | 13           |
| <b>Protein folding and trafficking</b> |             |                                                                 |              |              |
| IPI00187430.3                          | Rab2b       | Ras-related protein Rab-2B                                      | 1            | 6            |
| IPI00653744.1                          | Lrrc59      | Leucine rich repeat containing 59                               | 0            | 2            |
| IPI00133119.1                          | Rer1        | Retention In Endoplasmic Reticulum Sorting Receptor 1           | 0            | 2            |
| IPI00857758.1                          | Tmub1       | Transmembrane and ubiquitin-like domain containing 1            | 0            | 3            |
| IPI00123342.4                          | Hyou1       | Hypoxia up-regulated protein 1                                  | 1            | 23           |
| IPI00676130.1                          | Tmx4        | Thioredoxin domain containing 13                                | 0            | 4            |
| <b>Ion channels</b>                    |             |                                                                 |              |              |
| IPI00331064.7                          | Cacna1e     | Calcium channel, voltage-dependent, R type, alpha 1E subunit    | 0            | 2            |
| IPI00761641.1                          | Scn2a1      | Sodium channel, voltage-gated, type II, alpha 1                 | 0            | 3            |
| <b>Enzyme activities</b>               |             |                                                                 |              |              |
| IPI00270326.1                          | Psmc2       | Proteasome 26S subunit, ATPase 2                                | 0            | 2            |
| IPI00322145.10                         | Ptplad1     | Protein tyrosine phosphatase-like protein PTPLAD1               | 0            | 2            |
| IPI00309322.3                          | Hmox2       | Heme oxygenase 2                                                | 1            | 7            |
| IPI00119945.1                          | Nit2        | Omega-amidase NIT2                                              | 0            | 2            |

|                                    |               |                                                               |   |   |
|------------------------------------|---------------|---------------------------------------------------------------|---|---|
| IPI00121341.1                      | Tmx1          | Thioredoxin-related transmembrane protein 1                   | 0 | 4 |
| IPI00918076.1                      | Agpat5        | 1-Acylglycerol-3-Phosphate O-Acyltransferase 5                | 0 | 2 |
| IPI00877337.1                      | Dhrs7b        | Isoform 2 of Dehydrogenase/reductase SDR family member 7B     | 0 | 3 |
| <b>Mitochondria and associated</b> |               |                                                               |   |   |
| IPI00225254.6                      | Mtx2          | Metaxin-2                                                     | 0 | 6 |
| IPI00420734.1                      | Mff           | Isoform 1 of Mitochondrial fission factor                     | 0 | 4 |
| IPI00131896.1                      | Brp44         | Brain protein 44                                              | 0 | 2 |
| IPI00857677.1                      | Mrpl3         | Mitochondrial Ribosomal Protein L3                            | 0 | 3 |
| IPI00230715.5                      | Ndufa13       | NADH dehydrogenase [ubiquinone] 1 alpha subcomplex subunit 13 | 0 | 3 |
| IPI00655156.3                      | Ccdc109a      | Isoform 1 of Coiled-coil domain-containing protein 109A       | 0 | 7 |
| <b>Miscellaneous</b>               |               |                                                               |   |   |
| IPI00816859.1                      | Ccdc127       | Isoform 2 of Coiled-coil domain-containing protein 127        | 0 | 3 |
| IPI00351206.5                      | Pgrmc2        | Membrane-associated progesterone receptor component 2         | 0 | 3 |
| IPI00828496.2                      | Emd           | Emerin                                                        | 0 | 5 |
| IPI00125310.1                      | C1qa          | Complement C1q subcomponent subunit A                         | 1 | 9 |
| IPI00124470.1                      | C1qc          | Complement C1q subcomponent subunit C                         | 0 | 6 |
| IPI00266836.1                      | 1810026J23Rik | RIKEN cDNA 1810026J23 gene                                    | 0 | 3 |
| IPI00222697.1                      | Syng1         | Isoform 1B of Synaptogyrin-1                                  | 1 | 9 |
| IPI00881478.1                      | Ncald         | Neurocalcin delta                                             | 0 | 2 |
| IPI00882228.1                      | Tfg           | Trk-fused gene                                                | 1 | 6 |
| IPI00311764.6                      | BC007180      | BC007180 protein                                              | 0 | 2 |
| IPI00471120.2                      | Itm2c         | Integral membrane protein 2C                                  | 0 | 2 |
| IPI00122399.1                      | Glg1          | Golgi apparatus protein 1                                     | 1 | 8 |
| IPI00121627.3                      | C1ptm1        | Cleft lip and palate transmembrane protein 1                  | 0 | 3 |
| IPI00225244.1                      | Tusc3         | Tumor suppressor candidate 3                                  | 0 | 2 |
| IPI00885293.1                      | Zcwpw1        | Zinc Finger CW-Type And PWWP Domain Containing 1              | 0 | 3 |
| IPI00886162.1                      | Ncln          | Nicalin                                                       | 0 | 2 |
| IPI00755692.1                      | Lca5          | LCA5, lebercilin                                              | 0 | 2 |
| IPI00668429.1                      | Dsp           | Desmoplakin isoform 2                                         | 0 | 2 |

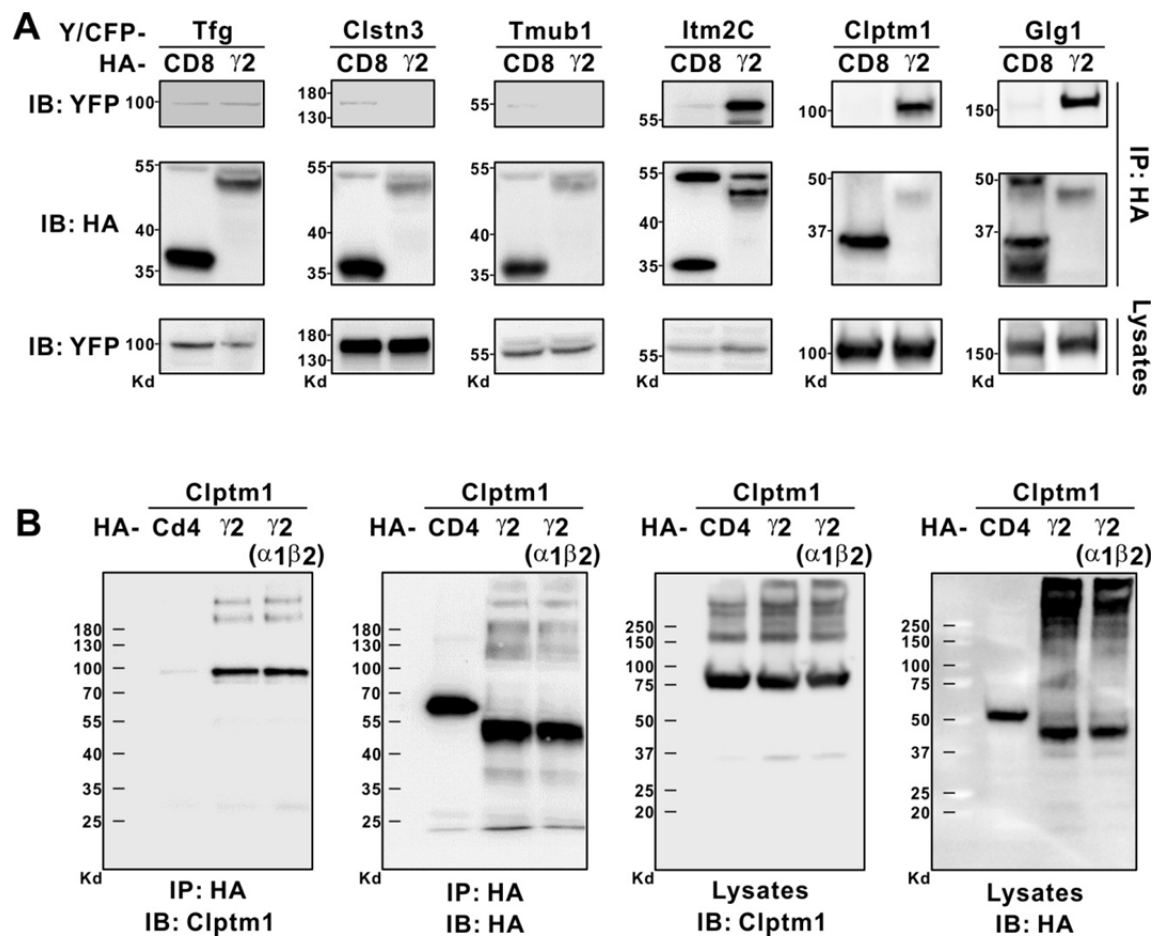

**Figure S1. Clptm1, Itm2C, and Glg1 Associate with GABA<sub>A</sub>R  $\gamma 2$ , Related to Figure 2**

(A) HEK293 cells were transfected with YFP- or CFP-tagged Trk-fused gene (Tfg), calstentennin-3 (Clstn3), Transmembrane and ubiquitin-like domain containing 1 (Tmub1), Itm2C, Clptm1, or Glg1 and HA-tagged GABA<sub>A</sub>R  $\gamma 2$  or CD8 as a negative control. The candidates were chosen from Table S1 except Clstn3 which was isolated from transgenic and not wild type mice from one experiment and had a previously identified functional role in inhibitory transmission. Only Itm2C, Clptm1, and Glg1 were specifically co-immunoprecipitated with GABA<sub>A</sub>R  $\gamma 2$ .

(B) Full Western Blot images of Figure 2B Clptm1.

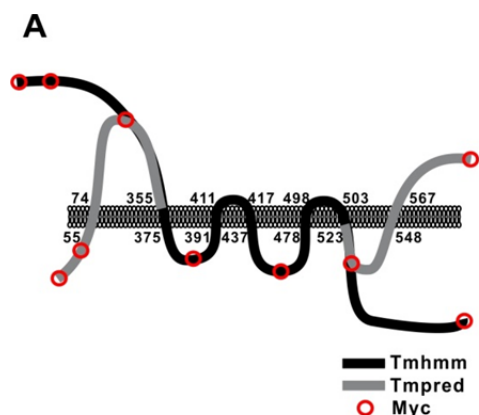

**Figure S2. Clptm1 Cannot be Detected on the Cell Surface, Related to Figure 3**

(A) The predicted topology of Clptm1 is shown with 5-7 transmembrane domains depending on the prediction program.

(B) A Myc tag was added at the N-terminus (NT), amino acid 30, 150, 382, 452, 535, or C-terminus (CT) of Clptm1 as diagrammed on the predicted structure in panel A.

Surface and total Clptm1 were detected using immunostaining in non-permeabilized and permeabilized conditions, respectively. Intracellular pools were observed but no Myc-Clptm1 was detected on the surface of transfected COS7 cells or cultured hippocampal neurons. Scale bars represent 20  $\mu\text{m}$  in COS7 cells and 50  $\mu\text{m}$  in neurons.

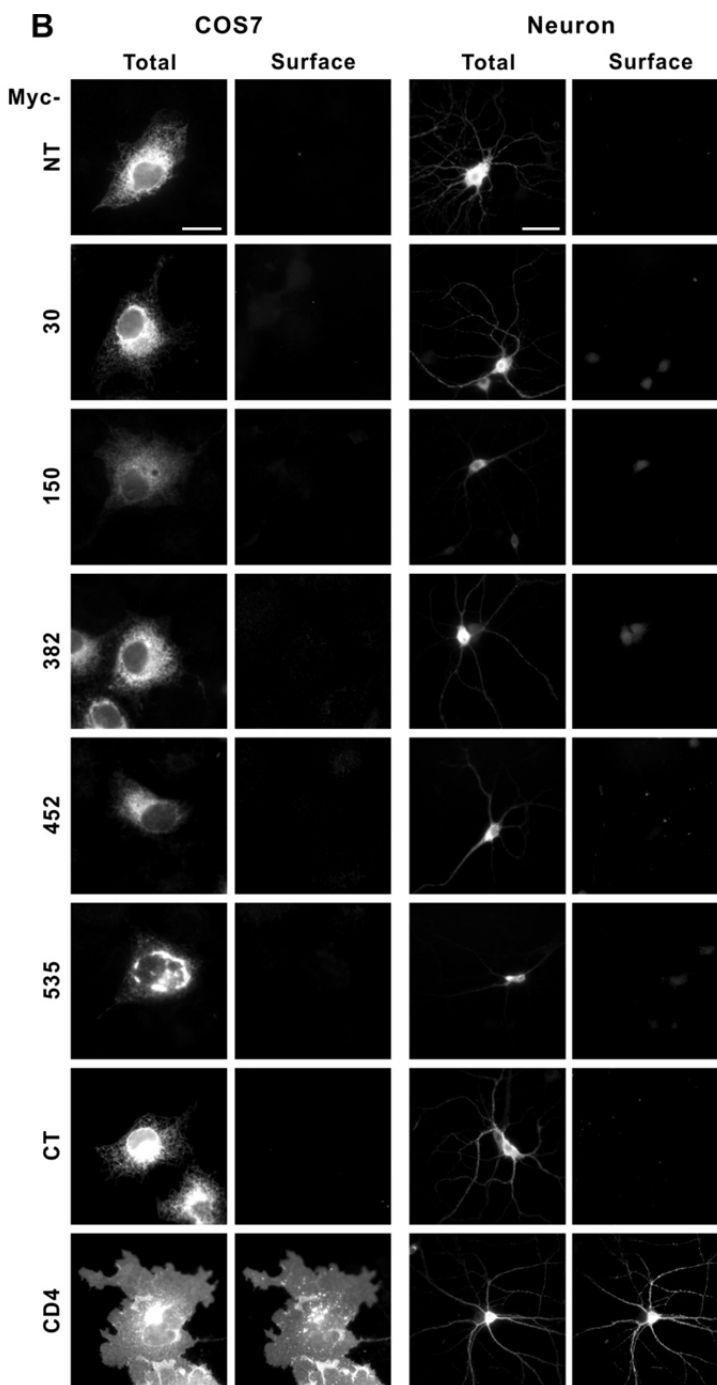

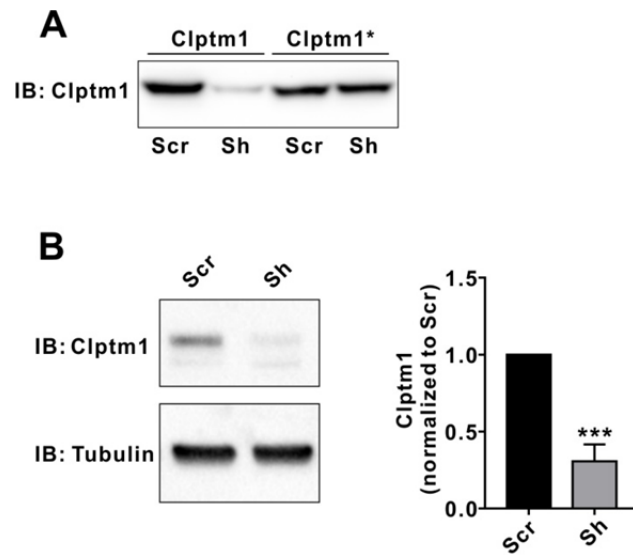

**Figure S3. Verification of Clptm1 Knockdown, Related to Figure 5**

(A) HEK293 cells were transfected with Clptm1 or RNAi-resistant Clptm1\* and shClptm1 (Sh) or shScramble (Scr) as control. Western blotting showed shClptm1 mediated knockdown and verified RNAi resistance of Clptm1\*.

(B) AAV vectors expressing shScramble (Scr) or shClptm1 (Sh) were added to cultured cortical neurons at 2 DIV, and cell lysates were collected at 14 DIV. The expression of native Clptm1 was significantly reduced by shClptm1 compared with shScramble. Results are expressed as mean  $\pm$  SEM.  $n=3$ , \*\*\*  $p < 0.001$ , t-test.

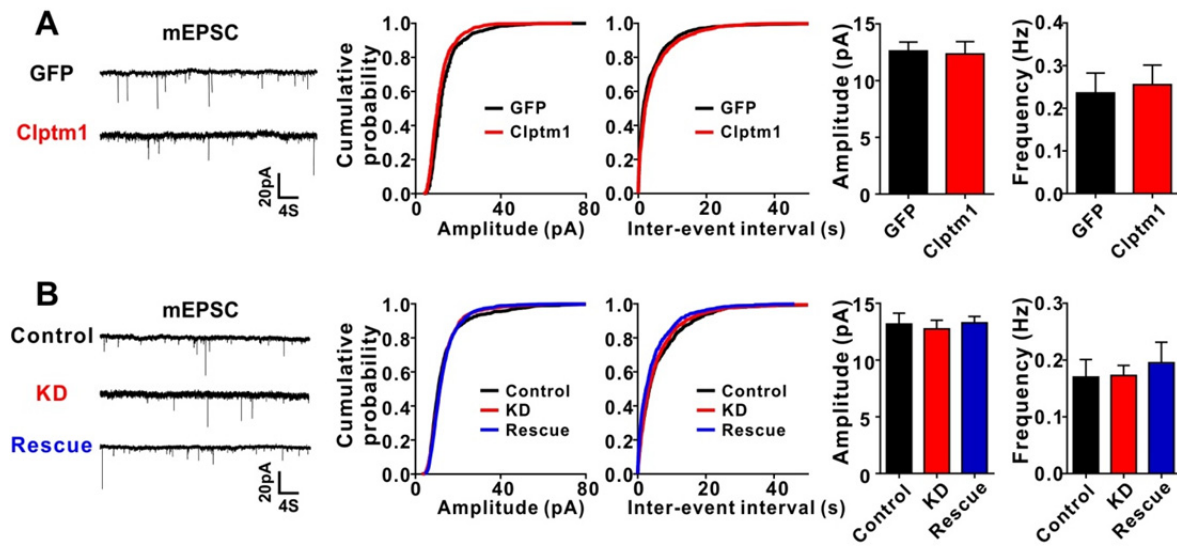

**Figure S4. Modulation of Clptm1 Expression Does Not Affect Excitatory Synaptic Transmission *In Vivo*, Related to Figure 6**

Neonatal mice were injected with the same AAV vectors as described in Figure 6. mEPSC recordings were performed at P14-17.

(A) Recordings were collected from visualized identified GFP or YFP positive CA1 pyramidal neurons. Overexpression of Clptm1 did not change mEPSC amplitude or frequency. n=22-23 cells from 2 mice each group.

(B) Recordings were collected from visualized identified Tdtomato and GFP or YFP dual positive CA1 pyramidal neurons. Knockdown of Clptm1 did not change mEPSC amplitude or frequency. n=25-27 cells from 2 mice each group.

Results are expressed as mean  $\pm$  SEM.

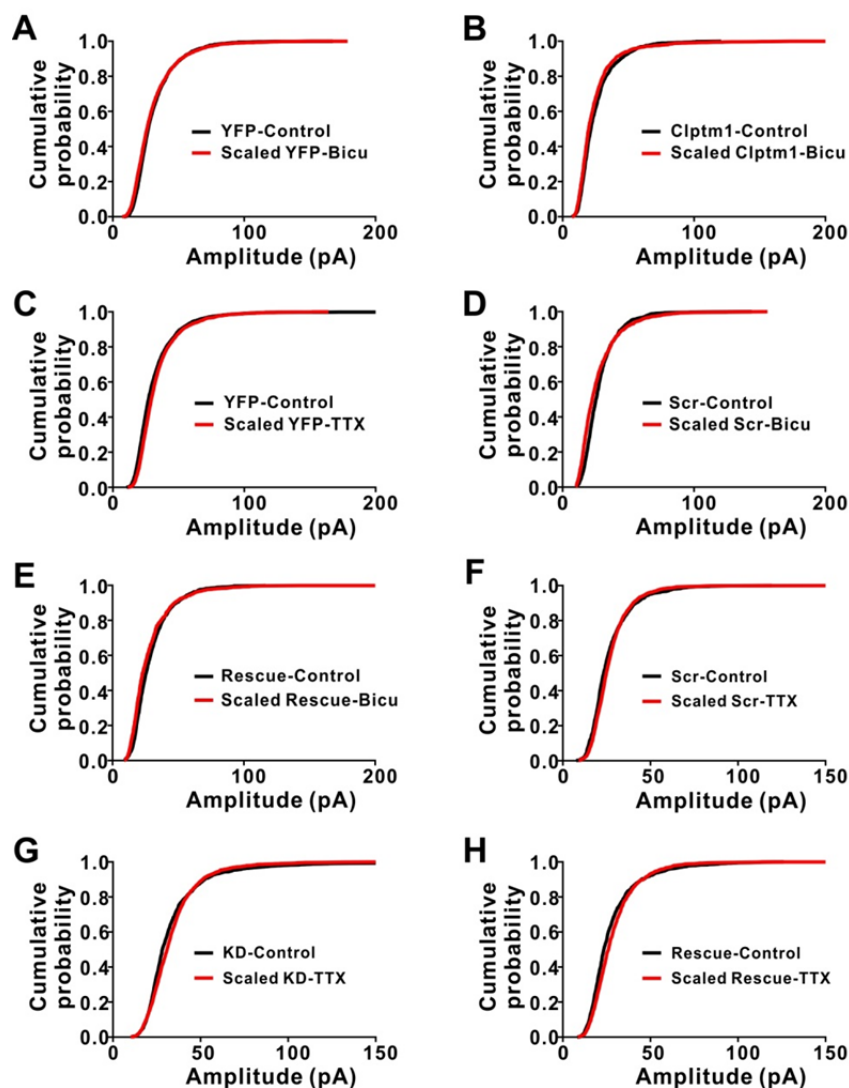

**Figure S5. Bicuculline and TTX Induce Multiplicative Scaling of GABAergic Synaptic Strength, Related to Figure 7**

Multiplicative scaling up of mIPSC amplitude was induced by bicuculline. The amplitude of mIPSCs recorded from bicuculline treatment groups was scaled by dividing by a factor of 1.45 (A, neurons transfected with YFP), 1.61 (B, neurons transfected with YFP-p2a-Clptm1), 1.54 (D, neurons transfected with shScramble-Tdtomato and YFP), or 1.53 (E, neurons transfected with shClptm1-Tdtomato and YFP-p2a-Clptm1\*), and compared to the corresponding control group. K-S tests showed no significant differences between control and scaled groups.

Multiplicative scaling down of mIPSC amplitude was induced by TTX. The amplitude of mIPSCs recorded from TTX treatment groups was scaled by dividing by a factor of 0.80 (C, neurons transfected with YFP), 0.81 (F, neurons transfected with shScramble-Tdtomato and YFP), 0.70 (G, neurons transfected with shClptm1-Tdtomato and YFP), 0.79 (H, neurons transfected with shClptm1-Tdtomato and YFP-p2a-Clptm1\*), and compared to the corresponding control group. K-S tests showed no significant differences between control and scaled groups.

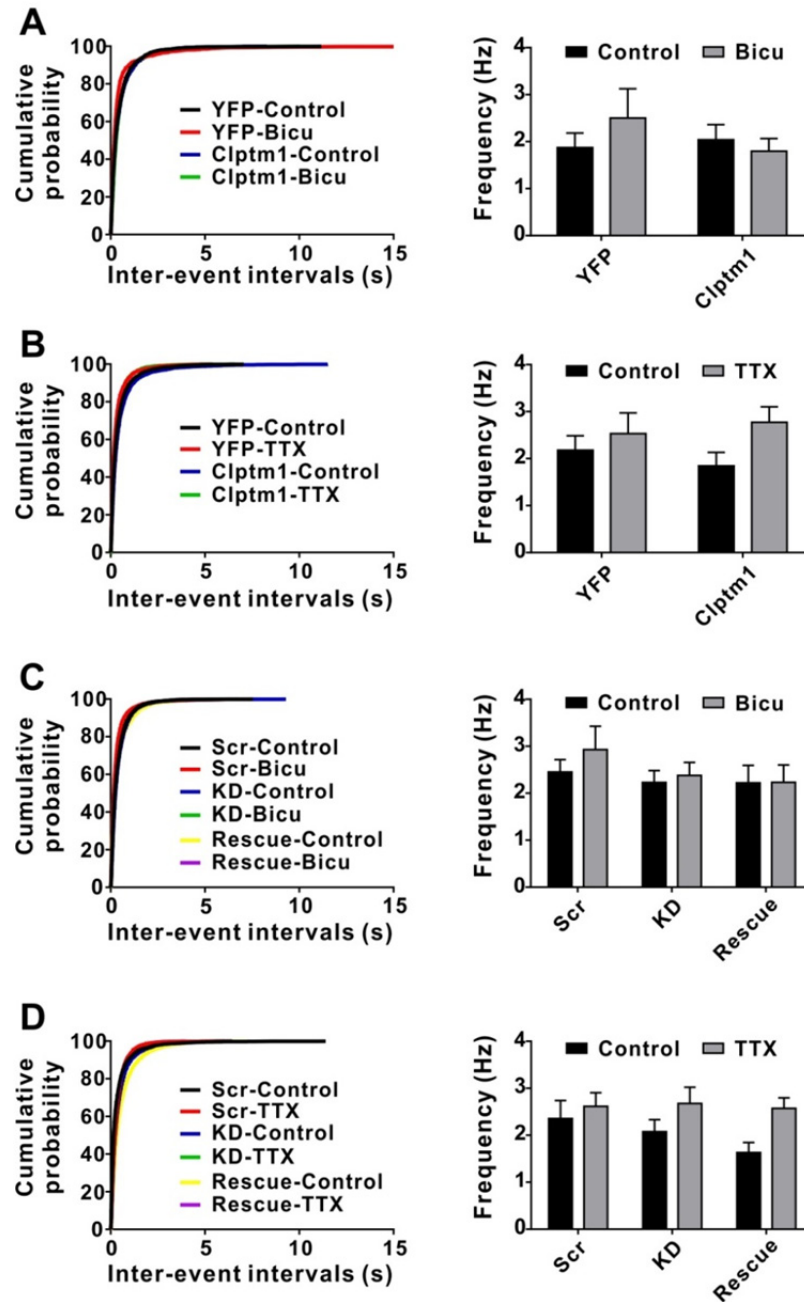

**Figure S6. Clptm1-modulated Inhibitory Synaptic Homeostasis Does Not Involve Changes in mIPSC Frequency, Related to Figure 7**

Cultured neurons were transfected and mIPSCs recorded as described in Figure 7. Transfection groups were Clptm1-p2a-YFP (Clptm1) compared with YFP control (A and B) or shClptm1-Tdtomato and YFP for knockdown (KD) compared with shScramble-Tdtomato and YFP (Scr) or shClptm1-Tdtomato and YFP-p2a-Clptm1\* (rescue) controls (C and D). Significant changes in mIPSC frequency were not detected among groups upon treatment with bicuculline (A and C) or TTX (B and D) except for panel (D) there was a significant effect of TTX ( $p < 0.05$  two-way ANOVA) but no significant effect of Clptm1 knockdown nor significant differences among groups in posthoc pairwise Holm-Sidak tests.
